# Supplementary material
Source: Springer Nature journal article supplement (https://www.springermedizin.de/resource/supplementary/12889_2013_6284_MOESM3_ESM.pdf/9499620)
Supplement: MOESM3 [file 9499620]

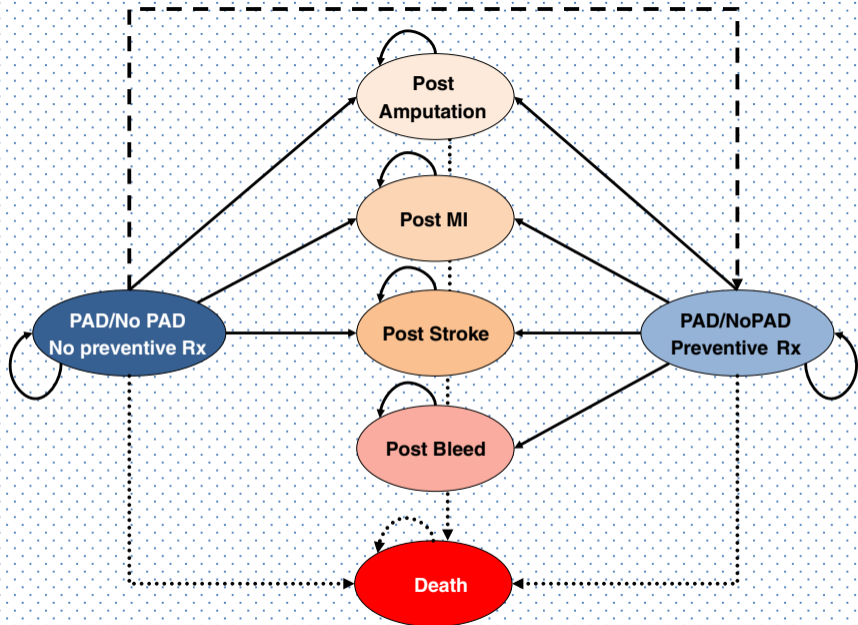

Stacked line-Symptomatic PAD; Solid lines -Local (amputation) & systemic events (MI, stroke, Bleed); dotted lines-All cause mortality, taking into account increased mortality risk after amputation, MI, stroke & bleed
